# Supplementary material for: Characterization of exclusive rib lesions detected by [68Ga]Ga-PSMA-11 PET/CT
Source: PubMed Central journal article supplement — Nucl Med Commun. 2024 Dec 10;46(1):95–105. doi: 10.1097/MNM.0000000000001919 (PMC11634074; doi:10.1097/mnm.0000000000001919), 2024-12-10
Supplement: nmc-46-095-s001.pdf [file nmc-46-095-s001.pdf]

## SUPPLEMENTAL

**Table 1** Clinical characteristics for the 54 patients included

| Characteristics                           | Value (%) <sup>†</sup> | Missing data<br>N (%) |
|-------------------------------------------|------------------------|-----------------------|
| Age                                       | 70 ± 7 years           |                       |
| Initial work up ( <i>N</i> = 39)          | 70 ± 7 years           | /                     |
| Biochemical recurrence ( <i>N</i> = 15)   | 71 ± 8 years           |                       |
| PSA level on imaging                      |                        |                       |
| Initial work up ( <i>N</i> = 39)          | 13.16 ± 8.11 ng/ml     | 1 (2.6%)              |
| Biochemical recurrence ( <i>N</i> = 15)   | 0.91 ± 1.87 ng/ml      | /                     |
| EAU risk groups :                         |                        |                       |
| Initial work up ( <i>N</i> = 39)          |                        |                       |
| Low                                       | 2/39 (5.1%)            |                       |
| Intermediate                              | 22/39 (56.4%)          |                       |
| High                                      | 15/39 (38.5%)          | /                     |
| Biochemical recurrence ( <i>N</i> = 15)   |                        |                       |
| Low                                       | 4/15 (26.7%)           |                       |
| Intermediate                              | 10/15 (66.7%)          |                       |
| High                                      | 1/15 (6.6%)            |                       |
| Gleason score                             |                        |                       |
| < 7                                       | 9 (16.7%)              |                       |
| = 7                                       | 34 (62.9%)             | /                     |
| > 7                                       | 11 (20.4%)             |                       |
| ISUP grade group at the time of diagnosis |                        |                       |
| 1                                         | 9 (16.7%)              |                       |
| 2                                         | 20 (37%)               |                       |
| 3                                         | 12 (22.2%)             | 2 (3.7%)              |
| 4                                         | 5 (9.3%)               |                       |
| 5                                         | 6 (11.1%)              |                       |
| Clinical staging                          |                        |                       |
| cT1-2a                                    | 29 (53.7%)             |                       |
| cT2b                                      | 9 (16.7%)              | 12 (22.2%)            |
| cT2c                                      | 4 (7.4%)               |                       |
| cT3-4                                     | 0 (0%)                 |                       |
| Curative treatment                        |                        |                       |
| Radical prostatectomy                     | 37 (68.5%)             |                       |
| Rescue radiotherapy                       | 10 (18.5%)             | /                     |
| Prostatic radiotherapy                    | 2 (3.7%)               |                       |
| Stereotactic body radiation therapy       | 5 (9.3%)               |                       |

Abbreviations: PSA, prostate specific antigen; EAU, European Association of Urology; ISUP, International Score Society of Urological pathology

**Table 2** PET/CT characteristics for the 54 patients included

| [ <sup>68</sup> Ga]Ga-PSMA-11 PET/CT Parameters | Value         | Missing data |
|-------------------------------------------------|---------------|--------------|
| miT (initial workup)                            |               |              |
| miT2u                                           | 9/39 (23.1%)  |              |
| miT2m                                           | 29/39 (74.4%) | /            |
| miT3b                                           | 1/39 (2.5%)   |              |
| miTr                                            | 0/15 (0%)     |              |
| miN (initial workup)                            |               |              |
| miN0                                            | 37/39 (94.9%) |              |
| miN1a                                           | 1/39 (2.55%)  | /            |
| miN1b                                           | 1/39 (2.55%)  |              |
| miM                                             |               |              |
| miM1b (malignant)                               | 16/54 (29.6%) |              |
| miMx (equivocal)                                | 8/54 (14.8%)  | /            |
| miM0 (benign)                                   | 30/54 (55.6%) |              |
| SUV <sub>max</sub> mean ± SD                    |               |              |
| Analog PET/CT (N = 28)                          | 3.6 ± 3.6     | /            |
| Digital PET/CT (N = 26)                         | 2.9 ± 0.9     |              |
| SUV <sub>max</sub> ratio mean ± SD              | 0.5 ± 0.4     | /            |
| Mean injected dose (MBq) mean ± SD              |               |              |
| Analog PET/CT (N = 28)                          | 142 ± 23.76   | /            |
| Digital PET/CT (N = 26)                         | 92.15 ± 12.51 |              |
| Acquisition time (minutes) mean ± SD            |               |              |
| Analog PET/CT (N = 28)                          | 73.5 ± 13.8   | /            |
| Digital PET/CT (N = 26)                         | 65.7 ± 9.8    |              |

Abbreviations: PET/CT, positron emission tomography combined with computed tomography; PSMA PET/CT, prostate-specific membrane antigen positron emission tomography combined with computed tomography; SUV<sub>max</sub>, maximum standardized uptake value; SD, standard deviation.

**Table 3** Proportion of reported benign, malignant, and equivocal rib lesions for each of the department's nuclear medicine physicians (7 years of experience for physician A and 10 years for the other 6)

|                    | Costal lesion<br>described benign<br>( <i>N</i> = 30) | Costal lesion<br>described malignant<br>( <i>N</i> = 16) | Costal lesion<br>described equivocal<br>( <i>N</i> = 8) |
|--------------------|-------------------------------------------------------|----------------------------------------------------------|---------------------------------------------------------|
| A ( <i>N</i> = 2)  | 1 (50%)                                               | 1 (50%)                                                  | 0 (0%)                                                  |
| B ( <i>N</i> = 7)  | 7 (100%)                                              | 0 (0%)                                                   | 0 (0%)                                                  |
| C ( <i>N</i> = 4)  | 4 (100%)                                              | 0 (0%)                                                   | 0 (0%)                                                  |
| D ( <i>N</i> = 11) | 3 (27.3%)                                             | 8 (72.7%)                                                | 0 (0%)                                                  |
| E ( <i>N</i> = 6)  | 3 (50%)                                               | 2 (33.3%)                                                | 1 (16.7%)                                               |
| F ( <i>N</i> = 16) | 7 (43.8%)                                             | 3 (18.7%)                                                | 6 (37.5%)                                               |
| G ( <i>N</i> = 8)  | 5 (62.5%)                                             | 2 (25%)                                                  | 1 (12.5%)                                               |

**Table 4** Proportions of TN, FN, TP, and FP according to PET/CT report and costal lesions with a final diagnosis of benign or malignant costal lesions.

|                    | TN ( <i>N</i> = 34) | FN ( <i>N</i> = 4) | TP ( <i>N</i> = 4) | FP ( <i>N</i> = 12) |
|--------------------|---------------------|--------------------|--------------------|---------------------|
| A ( <i>N</i> = 2)  | 1 (50%)             | 0 (0%)             | 0 (0%)             | 1 (50%)             |
| B ( <i>N</i> = 7)  | 5 (71.4%)           | 2 (28.6%)          | 0 (0%)             | 0 (0%)              |
| C ( <i>N</i> = 4)  | 4 (100%)            | 0 (0%)             | 0 (0%)             | 0 (0%)              |
| D ( <i>N</i> = 11) | 3 (27.3%)           | 0 (0%)             | 2 (18.2%)          | 6 (54.5%)           |
| E ( <i>N</i> = 6)  | 4 (66.7%)           | 0 (0%)             | 0 (0%)             | 2 (33.3%)           |
| F ( <i>N</i> = 16) | 11 (68.8%)          | 2 (12.5%)          | 1 (6.2%)           | 2 (12.5%)           |
| G ( <i>N</i> = 8)  | 6 (75%)             | 0 (0%)             | 1 (12.5%)          | 1 (12.5%)           |

Abbreviations: TN, true negative; FN, false negative; TP, true positive; FP, false positive; PET/CT, positron emission tomography combined with computed tomography.
